# Supplementary material for: Inhibitory Mechanisms of Lusianthridin on Human Platelet Aggregation
Source: MDPI journal article supplement (doi:10.3390/ijms22136846), 2021-06-25
Supplement: s1 [file s1]

## Supplemental Information For

### Inhibitory Mechanisms of Lusianthridin on Human Platelet Aggregation

Hla Nu Swe, Boonchoo Sritularak, Ponlapat Rojnuckarin and Rataya Luechapudiporn

#### S1. Inhibitory effect of lusianthridin on the activity of cyclooxygenase enzymes

Lusianthridin exhibited a concentration-dependent inhibitory effect on both COX-1 and COX-2 enzymatic activities. The  $IC_{50}$  values of each inhibition were derived using variable slope non-linear regression using GraphPad Prism 9.1 (GraphPad, San Diego, CA, USA), and the graphs are depicted in Figure S1. According to the results, lusianthridin exerted a 50% inhibitory effect on COX-1 and COX-2 enzymes at the concentrations of  $10.81 \pm 1.12 \mu\text{M}$  and  $0.17 \pm 1.62 \mu\text{M}$ , respectively.

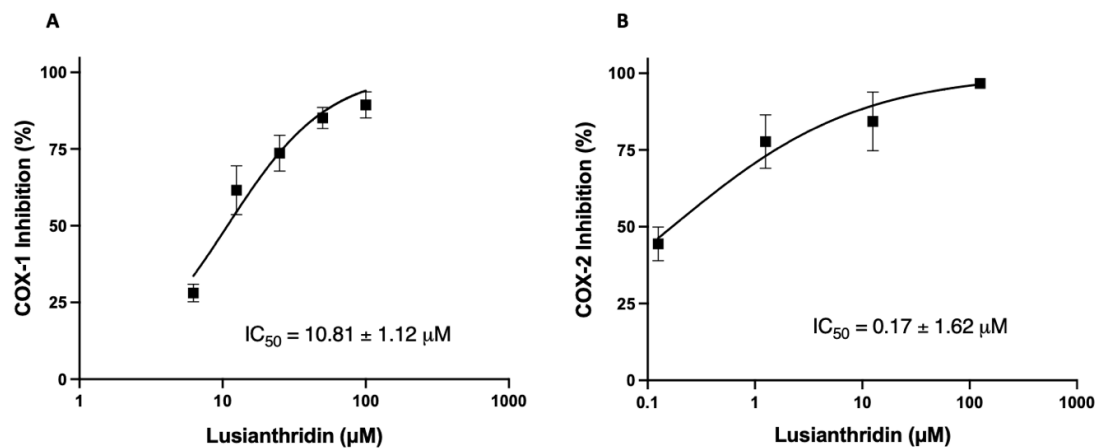

Figure S1: Lusianthridin concentration-dependently inhibited the expression of COX-1 (A) and COX-2 (B) enzymes. Data are expressed as mean  $\pm$  SEM; n=3).
